# Supplementary material
Source: PubMed Central journal article supplement (PMC7587098)
Supplement: JCM.00097-20-s0001.pdf [file JCM.00097-20-s0001.pdf]

## Supplemental data

**Supplemental Table 1: PRRSV whole genome sequenced strains description**

| <b>Strain identification number</b> | <b>PRRSV RT-qPCR Cq value in the sample</b> | <b>Type of sample</b> | <b>Number of animals pooled in the sample</b> | <b>GenBank accession number</b> |
|-------------------------------------|---------------------------------------------|-----------------------|-----------------------------------------------|---------------------------------|
| 1425619                             | n.a. <sup>a</sup>                           | Lung                  | 1                                             | MN865482                        |
| 1890826 #1 <sup>b</sup>             | 21,98                                       | Serum                 | 1                                             | MN865566                        |
| 1890826 #2                          | 21,98                                       | Serum                 | 1                                             | MN865567                        |
| 1926452                             | 18,2                                        | Lung                  | 1                                             | MN865483                        |
| 1927781                             | 23,74                                       | Serum                 | 1                                             | MN865484                        |
| 1943176                             | 21,3                                        | Sera                  | 6                                             | MN865485                        |
| 1943177                             | 14,5                                        | Sera                  | 6                                             | MN865486                        |
| 1943798                             | 14,88                                       | Sera                  | 6                                             | MN865487                        |
| 1951167                             | 22,75                                       | Sera                  | 7                                             | MN865488                        |
| 1952821 #1                          | 23,95                                       | PoT <sup>c</sup>      | 1                                             | MN865568                        |
| 1952821 #2                          | 23,95                                       | PoT                   | 1                                             | MN865569                        |
| 1953024                             | 21,68                                       | Sera                  | 7                                             | MN865489                        |
| 1953769                             | 22,45                                       | PoT                   | 1                                             | MN865490                        |
| 1956308                             | 20,17                                       | PoT                   | 1                                             | MN865491                        |
| 1957367                             | 23,24                                       | PoT                   | 1                                             | MN865492                        |
| 1961450                             | 24,42                                       | Sera                  | 5                                             | MN865493                        |
| 1961538                             | 19,98                                       | PoT                   | 1                                             | MN865494                        |
| 1966315                             | 20,08                                       | Sera                  | 4                                             | MN865495                        |
| 1966316                             | 18,48                                       | Sera                  | 4                                             | MN865496                        |
| 1968868 #1                          | 34,13                                       | Serum                 | 1                                             | MN865570                        |
| 1968868 #2                          | 34,13                                       | Serum                 | 1                                             | MN865571                        |
| 1968869                             | 27,08                                       | Serum                 | 1                                             | MN865497                        |
| 1978525                             | 21,79                                       | Sera                  | 8                                             | MN865498                        |
| 1980019                             | 22,27                                       | Lung                  | 1                                             | MN865499                        |
| 1982018                             | 21,15                                       | Lung                  | 1                                             | MN865500                        |
| 1982260                             | 20,36                                       | Sera                  | 10                                            | MN865501                        |
| 1982353                             | 18,19                                       | Sera                  | 6                                             | MN865502                        |
| 1982354                             | 16,86                                       | Sera                  | 6                                             | MN865503                        |
| 1982412                             | 13,89                                       | Lung                  | 1                                             | MN865504                        |
| 1985061                             | 24,19                                       | Lung                  | 1                                             | MN865505                        |
| 1985928                             | 15,25                                       | Serum                 | 1                                             | MN865506                        |
| 1994368                             | 19,7                                        | Lung                  | 1                                             | MN865507                        |

|         |       |       |      |          |
|---------|-------|-------|------|----------|
| 2012512 | 17,94 | Lung  | 1    | MN865508 |
| 2013955 | 22,99 | Lungs | 2    | MN865509 |
| 2016194 | 16,97 | Lung  | 1    | MN865510 |
| 2017769 | 22,23 | Lungs | 2    | MN865511 |
| 2018110 | 21,85 | Sera  | 5    | MN865512 |
| 2018114 | 19,62 | Sera  | 5    | MN865513 |
| 2020590 | 24,59 | PoT   | 1    | MN865514 |
| 2021685 | 21,22 | Lung  | 1    | MN865515 |
| 2023030 | 18,73 | Sera  | 3    | MN865516 |
| 2023323 | 22,55 | Lung  | 1    | MN865517 |
| 2029734 | 21,85 | Lung  | 1    | MN865518 |
| 2035290 | 22,86 | Sera  | 5    | MN865519 |
| 2048380 | 20,23 | Sera  | 10   | MN865520 |
| 2050445 | 20,06 | Serum | 1    | MN865521 |
| 2050887 | 23,52 | Sera  | 10   | MN865522 |
| 2057423 | 22,77 | Sera  | 10   | MN865523 |
| 2057984 | 24,4  | Sera  | 5    | MN865524 |
| 2058132 | 19,51 | PoT   | 1    | MN865525 |
| 2059368 | 18,09 | Sera  | 10   | MN865526 |
| 2059830 | 27,22 | Sera  | 5    | MN865527 |
| 2061291 | 22,58 | PoT   | 2    | MN865528 |
| 2063747 | 24,77 | Sera  | 2    | MN865529 |
| 2065929 | 26,37 | Sera  | 10   | MN865530 |
| 2067407 | 23,06 | Sera  | 5    | MN865531 |
| 2067408 | 24,33 | Sera  | 5    | MN865532 |
| 2067423 | 26,28 | Serum | 1    | MN865533 |
| 2069767 | 24,33 | PoT   | 2    | MN865534 |
| 2070378 | 25,98 | PoT   | 2    | MN865535 |
| 2072533 | 26,53 | Serum | 1    | MN865536 |
| 2073509 | 26,5  | Lung  | 1    | MN865537 |
| 2073979 | 18,83 | Sera  | 10   | MN865538 |
| 2075305 | 20,95 | Lung  | 1    | MN865539 |
| 2078279 | 18,19 | Sera  | 5    | MN865540 |
| 2078481 | n.a.  | Serum | 1    | MN865541 |
| 2082089 | 19,47 | Lung  | 1    | MN865542 |
| 2084371 | 23,98 | Lung  | 1    | MN865543 |
| 2087354 | n.a.  | Lung  | n.a. | MN865544 |
| 2087409 | 20,98 | Lung  | 1    | MN865545 |
| 2087619 | 21,35 | PoT   | 1    | MN865546 |
| 2089141 | 17,89 | PoT   | 1    | MN865547 |
| 2089260 | 16,81 | PoT   | 2    | MN865548 |
| 2092399 | 19,26 | Sera  | 2    | MN865549 |
| 2101209 | 23,53 | Sera  | 3    | MN865550 |

|            |       |            |                  |          |
|------------|-------|------------|------------------|----------|
| 2101687    | 16,44 | Sera       | 5                | MN865551 |
| 2104407    | 13,57 | Serum      | 1                | MN865552 |
| 2104469    | n.a.  | Lung       | 1                | MN865553 |
| 2108625    | 19,89 | Sera       | 6                | MN865554 |
| 2108698    | 29,18 | Serum      | 1                | MN865555 |
| 2109640    | 17,7  | Serum      | 1                | MN865556 |
| 2125706    | 28,83 | Oral fluid | Pen <sup>d</sup> | MN865557 |
| 2132295    | 27,42 | Serum      | 1                | MN865558 |
| 2137004    | 29,3  | Serum      | 1                | MN865559 |
| 2137961    | 28,62 | Serum      | 1                | MN865560 |
| 2146871    | 24,85 | Serum      | 1                | MN865561 |
| 2147100    | 32,84 | Oral fluid | Pen              | MN865562 |
| 2153073 #1 | 27,93 | Serum      | 1                | MN865572 |
| 2153073 #2 | 27,93 | Serum      | 1                | MN865573 |
| 2154774    | 11,5  | Serum      | 1                | MN865563 |
| 2158115    | 18,77 | Serum      | 1                | MN865564 |
| 2158116    | 17,24 | Serum      | 1                | MN865565 |

<sup>a</sup>n.a.: means the data is not available.

<sup>b</sup>The # after the sample identification number represent one of the two PRRSV strains that was identified during coinfection within the same clinical sample.

<sup>c</sup>PoT or pool of tissues include mainly lungs with several other type of tissues such as lymph nodes, spleen, liver, intestine, etc.

<sup>d</sup>The number of animals per pen during oral fluid sampling is unknown.
